# Supplementary material for: Flexible linkers and dinuclear metallic nodes build up an original metal–organic framework
Source: Royal Society of Chemistry journal article supplement (doi:10.1039/c3ce40506k), 2013-01-01
Supplement: c3ce40506k.pdf [file c3ce40506k.pdf]

## Supporting information for

# Flexible linkers and dinuclear metallic nodes build up an original metal-organic framework

*Angelica Vlad,<sup>a</sup> Mirela-Fernanda Zaltariov,<sup>a</sup> Sergiu Shova,<sup>a</sup> Ghenadie Novitchi,<sup>b</sup>*

*Cristian-Dragos Varganici,<sup>a</sup> Cyrille Train,<sup>b,c,\*</sup> Maria Cazacu<sup>a,\*</sup>*

<sup>a</sup>“Petru Poni” Institute of Macromolecular Chemistry, Aleea Gr. Ghica Voda 41A, 700487 Iasi, Romania

<sup>b</sup>Laboratoire National des Champs Magnétiques Intenses, CNRS UPR 3228, 25 Rue des Martyrs, 38042, Grenoble,

France

<sup>c</sup>Université Joseph Fourier, F-38041 Grenoble, France ; Institut Universitaire de France (IUF), 103, bd Saint-Michel, F-75005 Paris, France.

---

\*To whom correspondence will be addressed: e-mail: [cyrille.train@lncmi.cnrs.fr](mailto:cyrille.train@lncmi.cnrs.fr), [mcazacu@icmpp.ro](mailto:mcazacu@icmpp.ro)

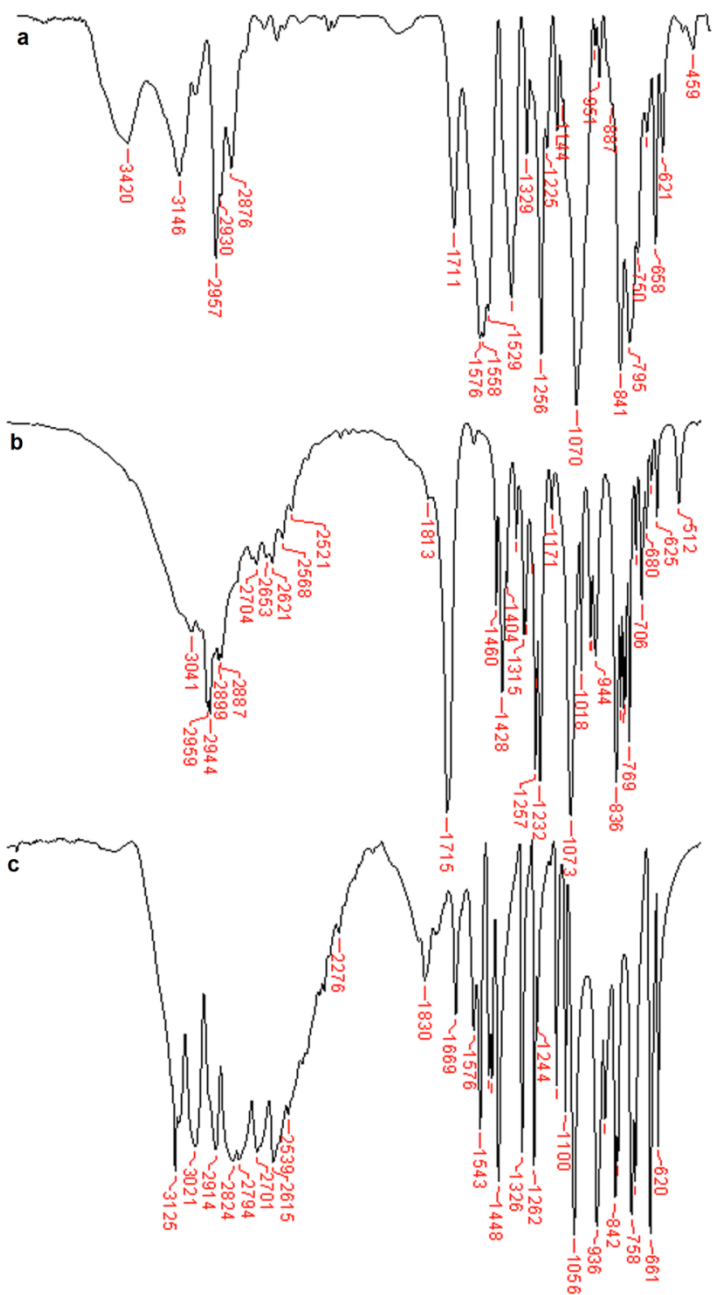

**Figure ESI1.** IR spectrum of copper complex **1** – a in comparison with that of 1,3-bis(carboxypropyl)tetramethyldisiloxane – b and imidazole - c.

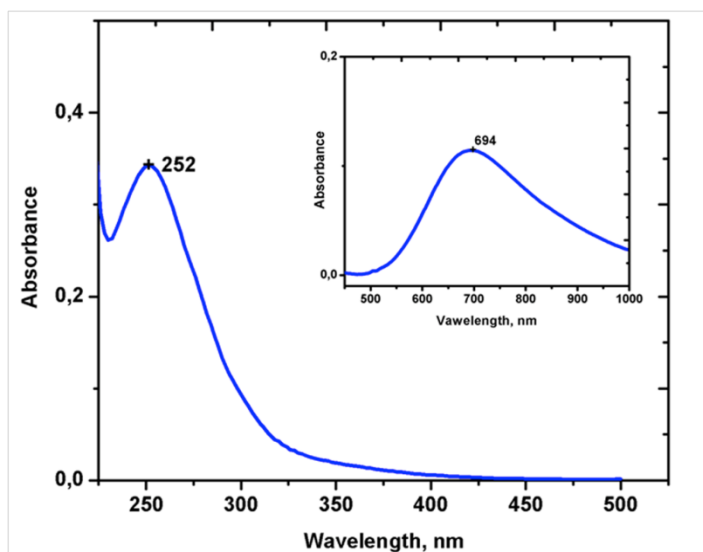

Figure ESI2. UV-Vis spectrum of the complex 1 dissolved in methanol.

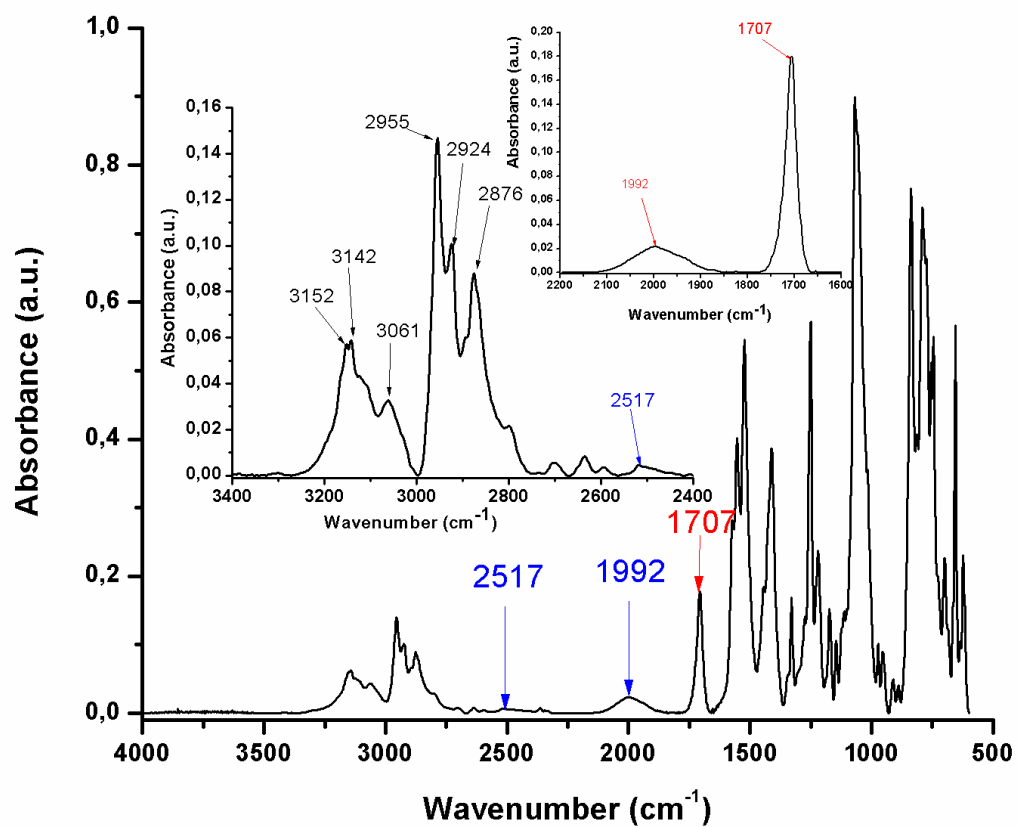

**Figure ESI3.** ATR-IR spectrum of the complex **1** dissolved in methanol.

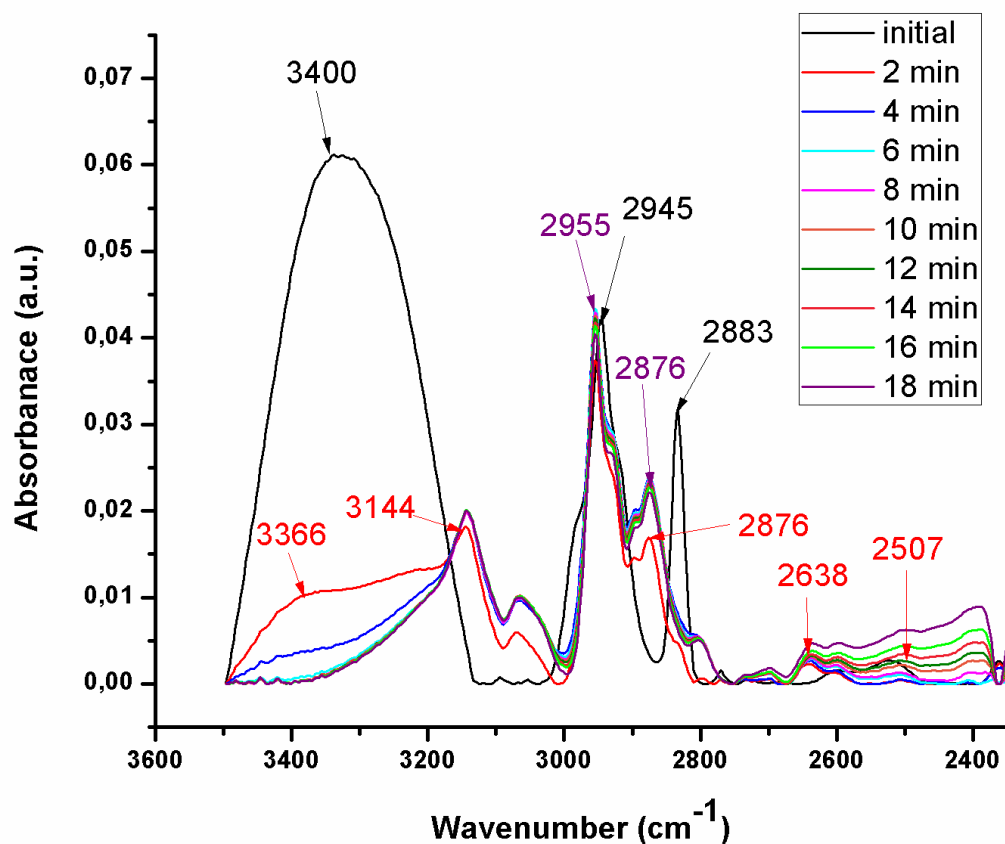

**Figure ESI4.** Details of ATR-IR spectra (2400-3500 cm<sup>-1</sup>) of the complex **1** dissolved in methanol (initial) and during the evaporation of methanol recorded at two minutes difference between them. Initially only the characteristic bands of methanol at 3400 (νOH), 2945 (νCH<sub>3</sub>) and 2883(νCH<sub>3</sub>) cm<sup>-1</sup> appear. By increase the sample concentration, as a result of the solvent evaporation, the bands characteristic for the complex **1** become visible and also the specific bands of hydrogen bonds at 2600-2500 cm<sup>-1</sup> appear.

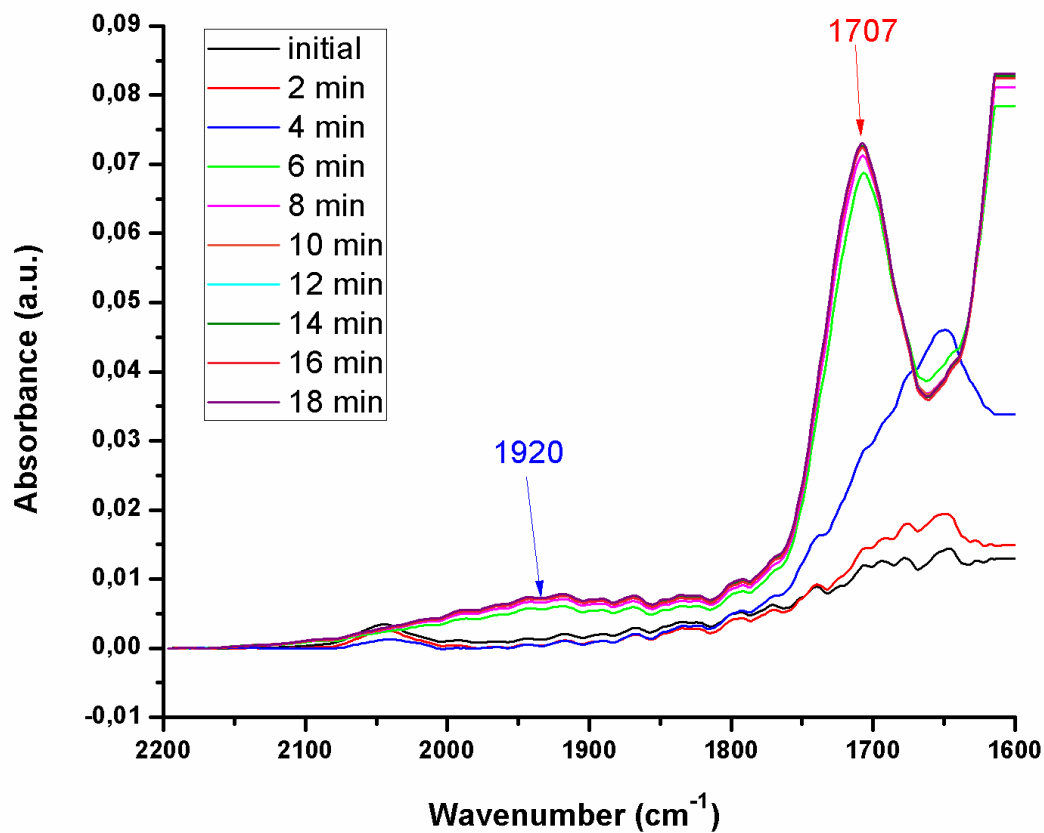

**Figure ESI5.** Details of ATR-IR spectra (1600-2200 cm<sup>-1</sup>) of the complex **1** dissolved in methanol (initial) and during the evaporation of methanol recorded at two minutes difference between them. Initially only a broad band attributed to hydroxyl groups appears at 1660 cm<sup>-1</sup> (νOH). By increase the sample concentration, by evaporation of the solvent, the carboxylic and hydrogen bonds specific bands at 1707 and 1920 cm<sup>-1</sup>, respectively develop.

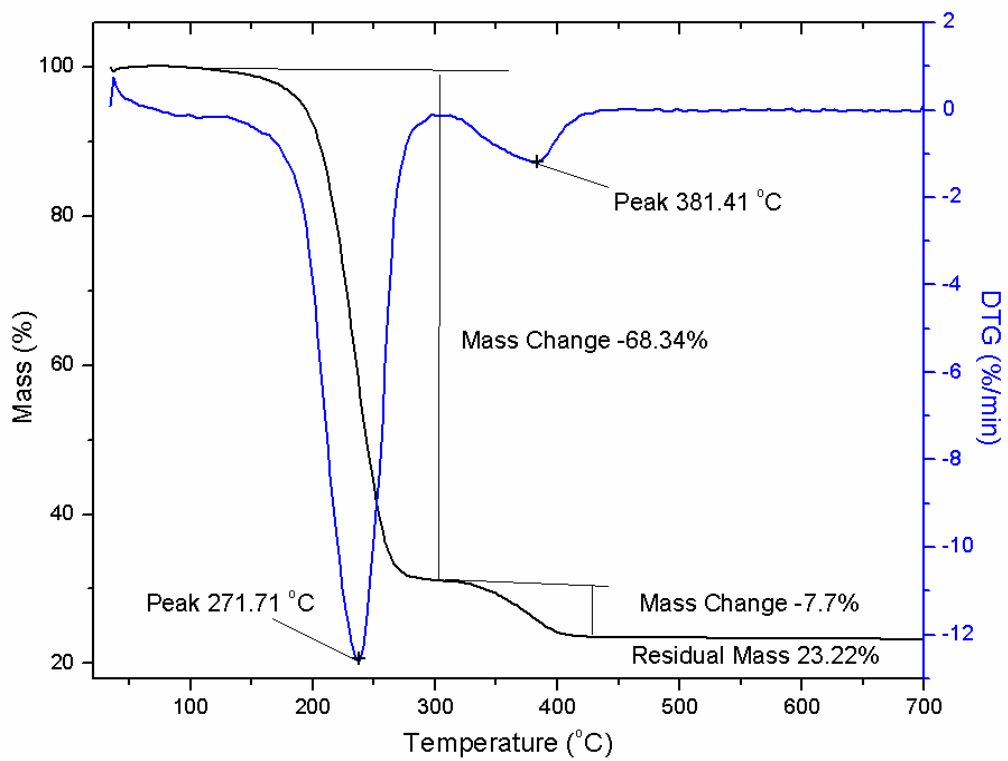

Figure ESI6. TG and DTG curves for complex 1

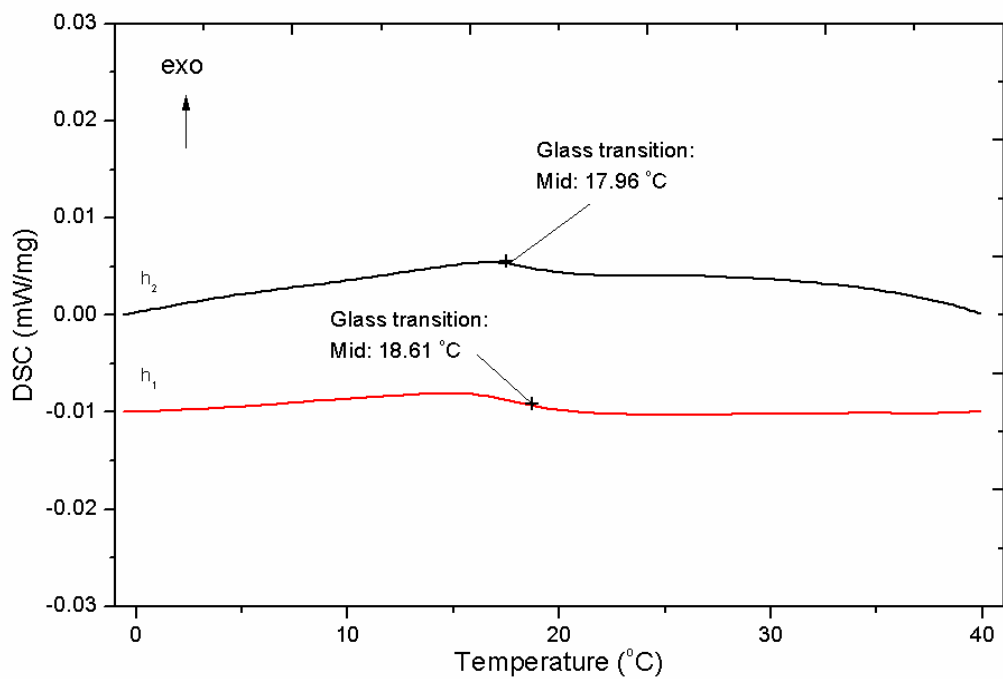

**Figure ESI7.** DSC curves for the complex (h1-first heating; h2-second heating).

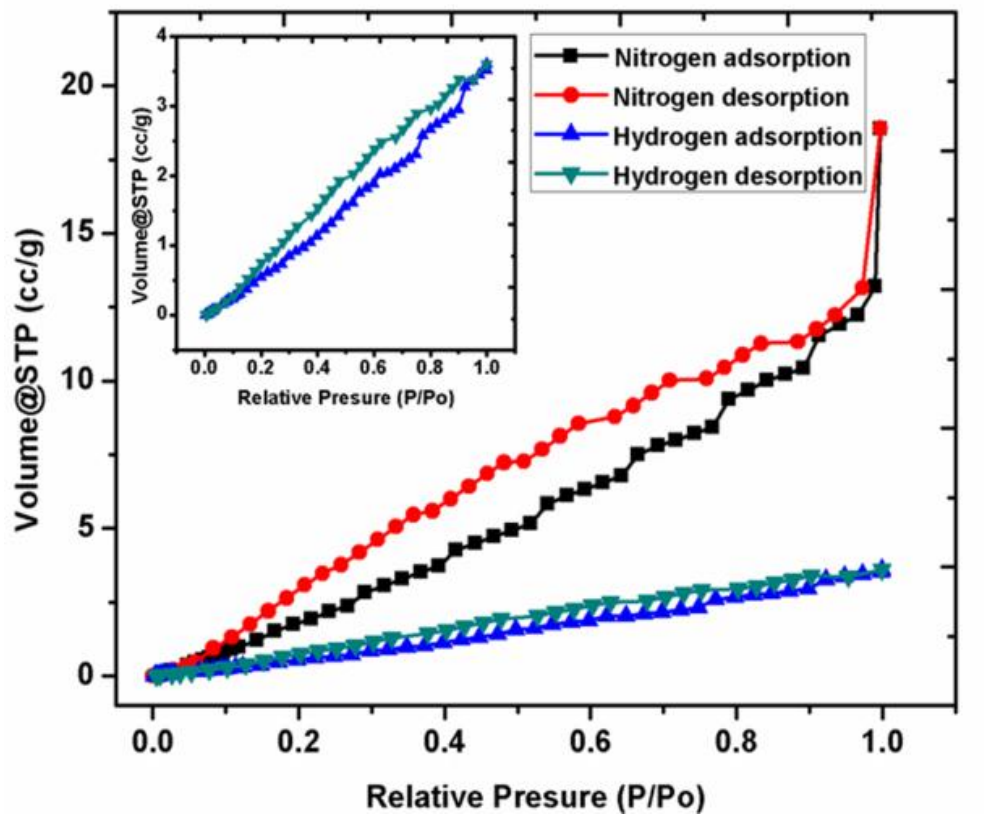

**Figure ESI8.**  $\text{H}_2$  and  $\text{N}_2$  sorption-desorption isotherms of **1** at 77 K,  $P$  being the relative pressure of the gas and  $P_0$  its saturated vapor pressure.



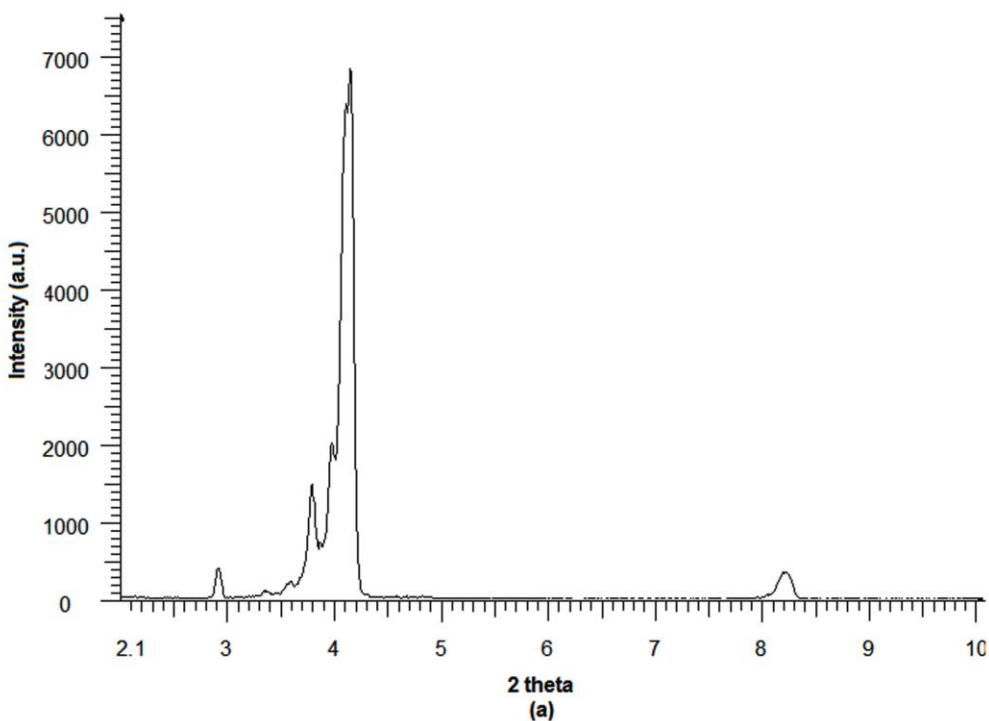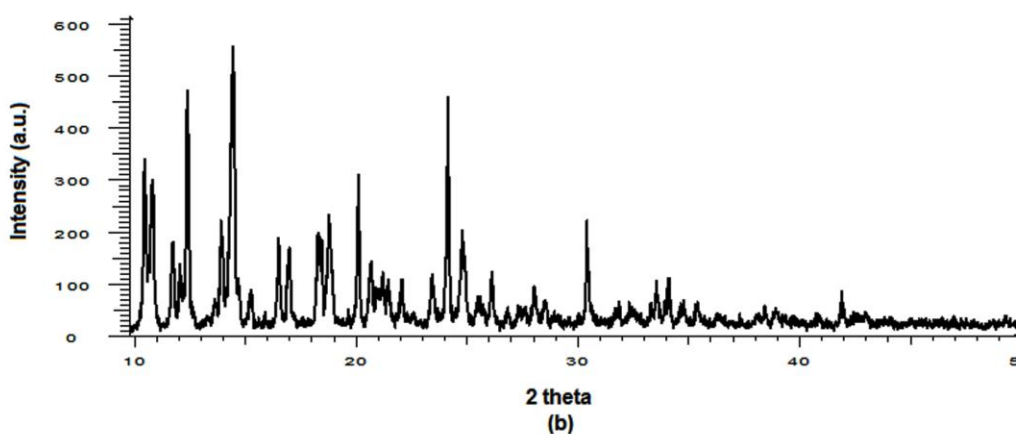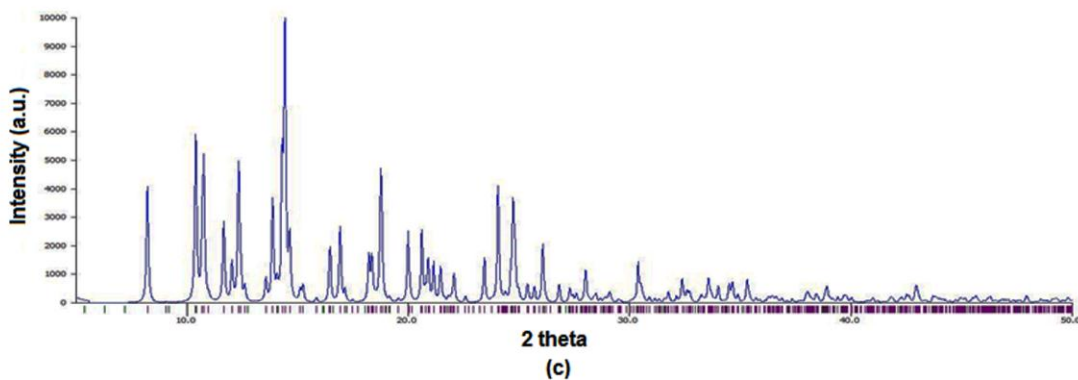

**Figure ESI9.** The experimental XRPD pattern of the polycrystalline sample in 2-10  $2\theta$  range (a); experimental XRPD pattern of the polycrystalline sample in 10-50  $2\theta$  range (b); the simulated XRPD on the base of cif.file obtained as the result of single-crystal X-ray study (c).
